# Supplementary material for: Inserting protonated phenanthroline derivatives into the interchain voids of anionic halometallate units to generate hybrid materials with tunable photochromic performance
Source: Royal Society of Chemistry journal article supplement (doi:10.1039/d2dt00190j), 2022-01-01
Supplement: d2dt00190j1.pdf [file d2dt00190j1.pdf]

## Supporting Information

### **Inserting protonated phenanthroline derivatives to interchain voids of anionic halometallate units to generate hybrid materials with tunable photochromic performance**

Gang-Mei Li, Zhen-Gang Liang, Zhen-Zhen Xue,\* Song-De Han,\* Jie Pan, and Guo-Ming Wang

*College of Chemistry and Chemical Engineering, Qingdao University, Shandong 266071, P. R. China.*

## Instruments used in this work.

Elemental analyses (C, H, and N) were measured on a Perkin-Elmer 240C analyzer (Perkin-Elmer, USA). IR spectra were measured on a MAGNA-560 (Nicolet) FT-IR spectrometer with KBr pellets. The luminescence data were measured on an F-7000 FL spectrophotometer. The solid-state UV-Vis spectra were measured on a PerkinElmer Lambda-950 spectrophotometer. Electron paramagnetic resonance (EPR) spectroscopy was measured on a JEOL JES-FA200 EPR spectrometer. The Xe-lamp for photochromic characterization is a Perfect Light PLS-SXE 300. The experimental powder X-ray diffraction (PXRD) analyses were conducted on a Rigaku D/max-2550 diffractometer with Cu-K $\alpha$  radiation ( $\lambda = 1.5418 \text{ \AA}$ ). Simulation of the PXRD curve was carried out by the single-crystal data and diffraction-crystal module of the Mercury software.

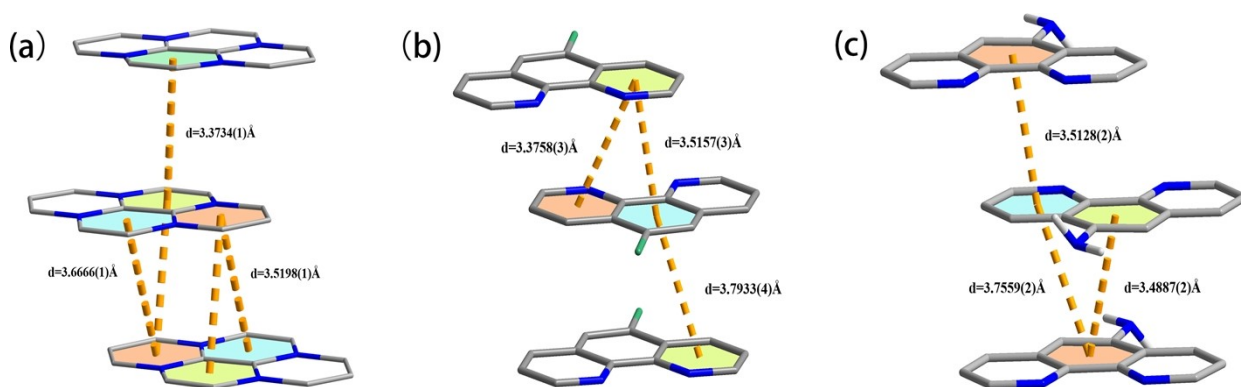

Fig. S1 The  $\pi \cdots \pi$  stacking interactions for complexes 1-3.

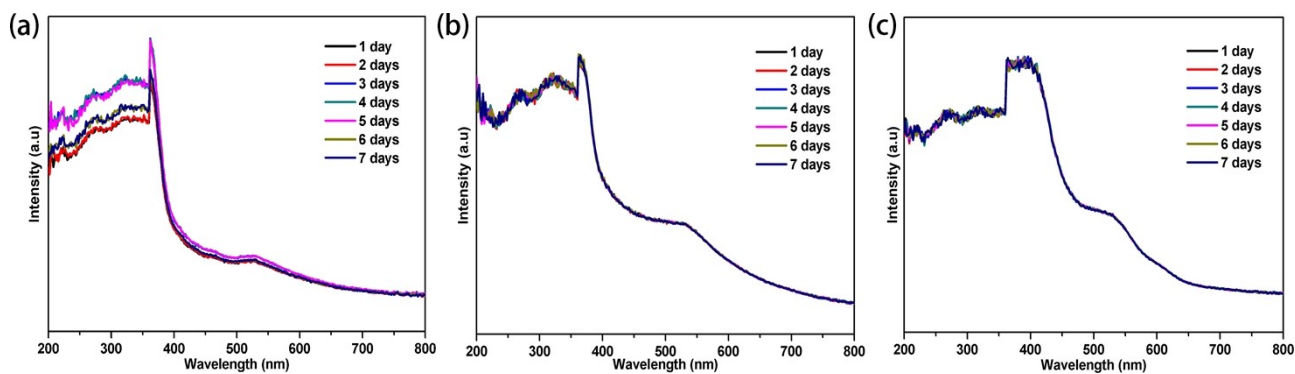

Fig. S2 The time-dependent UV-Vis spectra of 1 (a), 2 (b) and 3 (c).

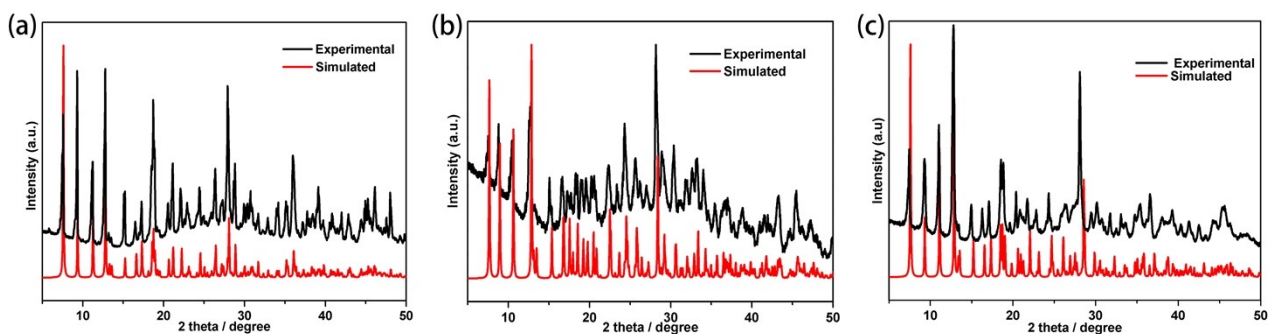

Fig. S3 PXRD patterns of **1** (a), **2** (b) and **3** (c).

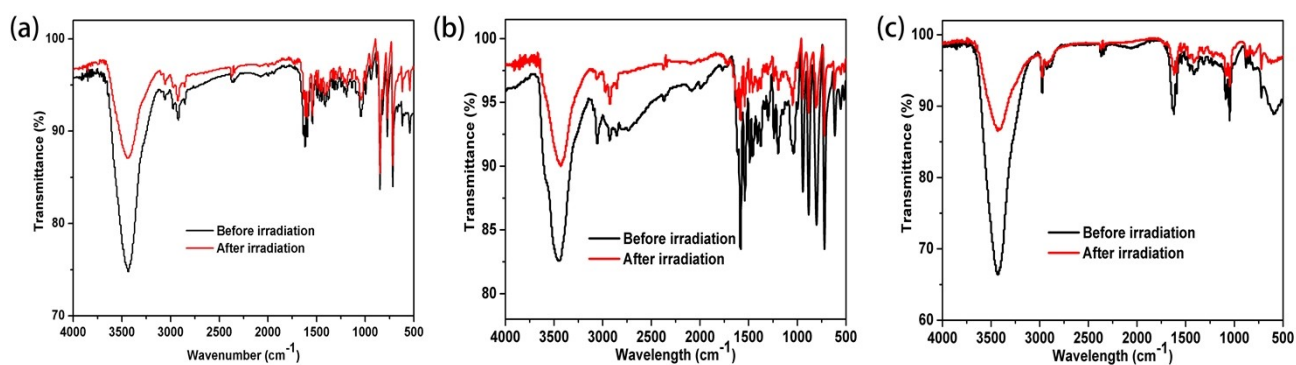

Fig. S4 IR patterns of **1** (a), **2** (b) and **3** (c).

**Table S1.** Selected bond lengths (Å) and angles (°) for **1**

|                       |            |                     |            |
|-----------------------|------------|---------------------|------------|
| Bi(1)-Cl(1)           | 2.6957(18) | Bi(1)-Cl(3)         | 2.7523(19) |
| Bi(1)-Cl(1)#1         | 2.9718(19) | Bi(1)-Cl(3)#2       | 2.9249(19) |
| Bi(1)-Cl(2)           | 2.5655(19) | Bi(1)-Cl(4)         | 2.5066(19) |
| Cl(1)-Bi(1)-Cl(1)#1   | 83.95(5)   | Cl(3)-Bi(1)-Cl(3)#2 | 83.03(5)   |
| Cl(1)-Bi(1)-Cl(3)#2   | 93.57(5)   | Cl(4)-Bi(1)-Cl(1)#1 | 171.30(6)  |
| Cl(1)-Bi(1)-Cl(3)     | 176.21(5)  | Cl(4)-Bi(1)-Cl(1)   | 89.14(6)   |
| Cl(2)-Bi(1)-Cl(1)     | 93.55(6)   | Cl(4)-Bi(1)-Cl(2)   | 94.92(6)   |
| Cl(2)-Bi(1)-Cl(1)#1   | 90.80(6)   | Cl(4)-Bi(1)-Cl(3)#2 | 90.48(6)   |
| Cl(2)-Bi(1)-Cl(3)     | 89.69(6)   | Cl(4)-Bi(1)-Cl(3)   | 92.55(6)   |
| Cl(2)-Bi(1)-Cl(3)#2   | 171.12(6)  | Bi(1)-Cl(1)-Bi(1)#1 | 96.05(5)   |
| Cl(3)-Bi(1)-Cl(1)#1   | 94.03(5)   | Bi(1)-Cl(3)-Bi(1)#2 | 96.97(5)   |
| Cl(3)#2-Bi(1)-Cl(1)#1 | 84.68(6)   |                     |            |

Symmetry code: #1: -x+1, -y+1, -z+1.

**Table S2.** Selected bond lengths (Å) and angles (°) for **2**

|                     |            |                       |            |
|---------------------|------------|-----------------------|------------|
| Bi(1)-Cl(2)         | 2.512(4)   | Bi(1)-Cl(3)           | 2.739(3)   |
| Bi(1)-Cl(4)         | 2.521(4)   | Bi(1)-Cl(1)           | 2.957(4)   |
| Bi(1)-Cl(1)#1       | 2.714(3)   | Bi(1)-Cl(3)#2         | 2.961(4)   |
| Cl(2)-Bi(1)-Cl(4)   | 93.44(17)  | Cl(1)#1-Bi(1)-Cl(1)   | 82.70(11)  |
| Cl(2)-Bi(1)-Cl(1)#1 | 93.19(14)  | Cl(3)-Bi(1)-Cl(1)     | 92.54(12)  |
| Cl(4)-Bi(1)-Cl(1)#1 | 90.86(14)  | Cl(2)-Bi(1)-Cl(3)#2   | 168.92(13) |
| Cl(2)-Bi(1)-Cl(3)   | 90.15(14)  | Cl(4)-Bi(1)-Cl(3)#2   | 93.69(15)  |
| Cl(4)-Bi(1)-Cl(3)   | 93.84(14)  | Cl(1)#1-Bi(1)-Cl(3)#2 | 95.17(12)  |
| Cl(1)#1-Bi(1)-Cl(3) | 174.06(13) | Cl(3)-Bi(1)-Cl(3)#2   | 80.93(11)  |
| Cl(2)-Bi(1)-Cl(1)   | 87.65(15)  | Cl(1)-Bi(1)-Cl(3)#2   | 86.21(13)  |
| Cl(4)-Bi(1)-Cl(1)   | 173.53(12) |                       |            |

Symmetry code: #1: -x+2, -y+1, -z.

**Table S3.** Selected bond lengths (Å) and angles (°) for **3**

|                         |           |                        |            |
|-------------------------|-----------|------------------------|------------|
| Bi(00)-Cl(00)           | 2.687(2)  | Bi(00)-Cl(2)           | 2.517(3)   |
| Bi(00)-Cl(00)#1         | 2.983(3)  | Bi(00)-Cl(3)           | 2.518(3)   |
| Bi(00)-Cl(1)#2          | 2.951(3)  | Cl(00)-Bi(00)#1        | 2.983(3)   |
| Bi(00)-Cl(1)            | 2.753(3)  | Cl(1)-Bi(00)#2         | 2.951(3)   |
| Cl(00)-Bi(00)-Cl(00)#1  | 84.27(9)  | Cl(2)-Bi(00)-Cl(1)#2   | 92.89(9)   |
| Cl(00)-Bi(00)-Cl(1)#2   | 93.75(8)  | Cl(2)-Bi(00)-Cl(3)     | 93.24(12)  |
| Cl(00)-Bi(00)-Cl(1)     | 175.66(8) | Cl(3)-Bi(00)-Cl(00)#1  | 86.49(11)  |
| Cl(1)-Bi(00)-Cl(00)#1   | 93.07(8)  | Cl(3)-Bi(00)-Cl(00)    | 93.02(10)  |
| Cl(1)#2-Bi(00)-Cl(00)#1 | 88.10(8)  | Cl(3)-Bi(00)-Cl(1)     | 90.23(10)  |
| Cl(1)-Bi(00)-Cl(1)#2    | 82.72(8)  | Cl(3)-Bi(00)-Cl(1)#2   | 170.87(10) |
| Cl(2)-Bi(00)-Cl(00)     | 89.90(10) | Bi(00)-Cl(00)-Bi(00)#1 | 95.72(9)   |
| Cl(2)-Bi(00)-Cl(00)#1   | 174.14(8) | Bi(00)-Cl(1)-Bi(00)#2  | 97.28(8)   |
| Cl(2)-Bi(00)-Cl(1)      | 92.79(10) |                        |            |

Symmetry code: #1: -x+1, -y, -z+2.

**Table S4.** Details of selected hydrogen bond in **1**

| D-H...A       | $d(\text{D-H})$ (Å) | $d(\text{H}\cdots\text{A})$ (Å) | $d(\text{D}\cdots\text{A})$ (Å) | $\angle(\text{DHA})$ (deg) |
|---------------|---------------------|---------------------------------|---------------------------------|----------------------------|
| C2-H2A...Cl3  | 0.93                | 2.923                           | 3.790                           | 155                        |
| C3-H3...Cl4   | 0.93                | 2.887                           | 3.559                           | 130                        |
| C4-H4B...Cl4  | 0.93                | 3.146                           | 3.409                           | 102                        |
| C9-H9A...Cl4  | 0.93                | 2.933                           | 3.564                           | 126                        |
| C9-H9A...Cl2  | 0.93                | 2.926                           | 3.784                           | 154                        |
| C10-H10...Cl4 | 0.93                | 2.923                           | 3.574                           | 125                        |

**Table S5.** Details of selected hydrogen bond in **2**

| D-H...A       | $d(\text{D-H})$ (Å) | $d(\text{H...A})$ (Å) | $d(\text{D...A})$ (Å) | $\angle(\text{DHA})$ (deg) |
|---------------|---------------------|-----------------------|-----------------------|----------------------------|
| C1-H1...C11   | 0.93                | 2.822                 | 3.522                 | 132                        |
| C3-H3...C11   | 0.93                | 3.006                 | 3.430                 | 109                        |
| C11-H11...C13 | 0.93                | 2.861                 | 3.774                 | 167                        |

**Table S6.** Details of selected hydrogen bond in **3**

| D-H...A      | $d(\text{D-H})$ (Å) | $d(\text{H...A})$ (Å) | $d(\text{D...A})$ (Å) | $\angle(\text{DHA})$ (deg) |
|--------------|---------------------|-----------------------|-----------------------|----------------------------|
| N3-H3A...C13 | 0.94                | 2.80                  | 3.1811(3)             | 105                        |
| C8-H8...C11  | 0.95                | 2.76                  | 3.6827(3)             | 164                        |
